# Supplementary material for: Social and ethnic group differences in healthcare use by children aged 0–14 years: a population-based cohort study in England from 2007 to 2017
Source: PubMed Central journal article supplement — Arch Dis Child. 2021 Jul 9;107(1):32–9. doi: 10.1136/archdischild-2020-321045 (PMC8685637; doi:10.1136/archdischild-2020-321045), 2021-07-09
Supplement: archdischild-2020-321045supp003.pdf [file archdischild-2020-321045supp003.pdf]

## Supplemental Table 1 – Raw Data for IMD Analyses in Figure 1

| GP CONSULTATIONS                                        |             |            |            |               |             | ED VISITS                                           |             |            |            |               |             | NB We used 2011-12 as baseline year for comparisons of ED data due to changes in data completeness |   |   |   |               |  |
|---------------------------------------------------------|-------------|------------|------------|---------------|-------------|-----------------------------------------------------|-------------|------------|------------|---------------|-------------|----------------------------------------------------------------------------------------------------|---|---|---|---------------|--|
| Least deprived                                          |             |            |            | Most deprived |             | Least deprived                                      |             |            |            | Most deprived |             | Least deprived                                                                                     |   |   |   | Most deprived |  |
| 1                                                       | 2           | 3          | 4          | 5             |             | 1                                                   | 2           | 3          | 4          | 5             |             | 1                                                                                                  | 2 | 3 | 4 | 5             |  |
| 2007/8                                                  | 2020.906658 | 1986.78685 | 1998.5847  | 2001.13232    | 1977.958259 | 2007/8                                              | 0.219974345 | 0.42177621 | 0.68353602 | 0.62816366    | 0.964791821 |                                                                                                    |   |   |   |               |  |
| 2008/9                                                  | 2083.916321 | 2076.86052 | 2074.57405 | 2072.44018    | 2036.834453 | 2008/9                                              | 96.03570518 | 89.7043556 | 100.365338 | 108.763323    | 139.8467973 |                                                                                                    |   |   |   |               |  |
| 2009/10                                                 | 2067.76618  | 2036.28427 | 2059.62544 | 2058.13732    | 2022.502783 | 2009/10                                             | 176.5255805 | 171.052278 | 184.506859 | 211.558809    | 276.0709551 |                                                                                                    |   |   |   |               |  |
| 2010/11                                                 | 2135.956515 | 2088.25814 | 2119.07189 | 2069.97275    | 2032.239414 | 2010/11                                             | 230.3544409 | 241.558726 | 260.561827 | 290.680028    | 345.1796002 |                                                                                                    |   |   |   |               |  |
| 2011/12                                                 | 2112.940746 | 2067.84915 | 2098.29506 | 2043.00452    | 2001.012099 | 2011/12                                             | 265.4393028 | 287.722538 | 313.231041 | 347.727596    | 389.60124   |                                                                                                    |   |   |   |               |  |
| 2012/13                                                 | 2156.402907 | 2147.32742 | 2159.27358 | 2103.46714    | 2060.839756 | 2012/13                                             | 276.4607509 | 305.341579 | 335.162245 | 372.702636    | 410.1886235 |                                                                                                    |   |   |   |               |  |
| 2013/14                                                 | 2092.038759 | 2030.42338 | 2041.7811  | 2029.96102    | 1972.102271 | 2013/14                                             | 286.4601992 | 311.539774 | 340.607129 | 379.129487    | 416.628945  |                                                                                                    |   |   |   |               |  |
| 2014/15                                                 | 2070.218569 | 2009.51177 | 1996.80423 | 2012.19363    | 1957.462798 | 2014/15                                             | 319.2872382 | 343.357742 | 365.309381 | 401.916609    | 424.2971376 |                                                                                                    |   |   |   |               |  |
| 2015/16                                                 | 1896.098845 | 1835.04768 | 1864.85645 | 1868.93031    | 1832.415926 | 2015/16                                             | 325.5003425 | 352.865718 | 369.756595 | 412.469554    | 445.9286063 |                                                                                                    |   |   |   |               |  |
| 2016/17                                                 | 1854.238023 | 1816.73159 | 1826.02218 | 1889.20102    | 1764.62117  | 2016/17                                             | 313.8882222 | 340.027193 | 372.899552 | 407.834847    | 447.3673949 |                                                                                                    |   |   |   |               |  |
| EMERGENCY ADMISSIONS                                    |             |            |            |               |             | ELECTIVE ADMISSIONS                                 |             |            |            |               |             |                                                                                                    |   |   |   |               |  |
| Least deprived                                          |             |            |            | Most deprived |             | Least deprived                                      |             |            |            | Most deprived |             | Least deprived                                                                                     |   |   |   | Most deprived |  |
| 1                                                       | 2           | 3          | 4          | 5             |             | 1                                                   | 2           | 3          | 4          | 5             |             | 1                                                                                                  | 2 | 3 | 4 | 5             |  |
| 2007/8                                                  | 66.5963756  | 69.7520964 | 69.5329861 | 80.8323263    | 93.13464336 | 2007/8                                              | 42.17836441 | 43.6062968 | 43.1866922 | 49.4947903    | 56.89036974 |                                                                                                    |   |   |   |               |  |
| 2008/9                                                  | 66.86101224 | 74.6873623 | 75.5036447 | 81.5968329    | 98.91059356 | 2008/9                                              | 39.09667128 | 47.2721679 | 46.5732804 | 48.2618254    | 55.13378548 |                                                                                                    |   |   |   |               |  |
| 2009/10                                                 | 68.31707689 | 73.3867291 | 78.0281774 | 84.3441549    | 97.65048025 | 2009/10                                             | 40.25280575 | 47.6340218 | 47.3316465 | 50.4547645    | 54.7614211  |                                                                                                    |   |   |   |               |  |
| 2010/11                                                 | 69.50016377 | 76.5223088 | 76.7307456 | 86.7218517    | 98.76008243 | 2010/11                                             | 40.82102171 | 48.4245082 | 48.9215903 | 48.5657219    | 54.79183408 |                                                                                                    |   |   |   |               |  |
| 2011/12                                                 | 67.28731191 | 72.668319  | 75.7658031 | 87.747235     | 99.66290488 | 2011/12                                             | 40.50228417 | 47.6810501 | 49.3302415 | 49.3118991    | 57.51895436 |                                                                                                    |   |   |   |               |  |
| 2012/13                                                 | 67.73659834 | 80.3539408 | 80.5089259 | 89.8059186    | 103.9399916 | 2012/13                                             | 40.13689188 | 52.3827941 | 48.5627702 | 47.0490519    | 58.34777041 |                                                                                                    |   |   |   |               |  |
| 2013/14                                                 | 66.95124379 | 74.9844011 | 80.6037669 | 90.2601123    | 98.80534005 | 2013/14                                             | 44.25401137 | 51.3411848 | 48.8942886 | 52.2671656    | 60.89149607 |                                                                                                    |   |   |   |               |  |
| 2014/15                                                 | 71.13356691 | 81.4651187 | 85.7468749 | 90.4384365    | 101.9500345 | 2014/15                                             | 45.1394241  | 50.1061612 | 49.3783807 | 50.1869281    | 60.92362395 |                                                                                                    |   |   |   |               |  |
| 2015/16                                                 | 73.7596091  | 82.482497  | 89.3966685 | 97.345974     | 103.4024654 | 2015/16                                             | 43.32094856 | 50.9451157 | 48.794331  | 49.4877456    | 60.67060775 |                                                                                                    |   |   |   |               |  |
| 2016/17                                                 | 76.26210179 | 78.9711138 | 89.1051917 | 96.2367394    | 99.58342927 | 2016/17                                             | 43.64361421 | 53.7746771 | 46.8781952 | 51.5932657    | 56.75977544 |                                                                                                    |   |   |   |               |  |
| OUTPATIENT ATTENDANCES                                  |             |            |            |               |             | Rates for all tables are given per 1000 child-years |             |            |            |               |             |                                                                                                    |   |   |   |               |  |
| NB 2015 data are of poor quality and therefore excluded |             |            |            |               |             | Least deprived                                      |             |            |            |               |             | Most deprived                                                                                      |   |   |   |               |  |
| 1                                                       | 2           | 3          | 4          | 5             |             | 1                                                   | 2           | 3          | 4          | 5             |             | 1                                                                                                  | 2 | 3 | 4 | 5             |  |
| 2007/8                                                  | 485.9811164 | 503.491136 | 499.437933 | 527.729573    | 546.1865713 |                                                     |             |            |            |               |             |                                                                                                    |   |   |   |               |  |
| 2008/9                                                  | 529.864209  | 559.955545 | 558.462329 | 580.707106    | 600.8722171 |                                                     |             |            |            |               |             |                                                                                                    |   |   |   |               |  |
| 2009/10                                                 | 583.3823689 | 624.243622 | 592.082576 | 608.230654    | 622.9836711 |                                                     |             |            |            |               |             |                                                                                                    |   |   |   |               |  |
| 2010/11                                                 | 623.4202026 | 657.131988 | 619.18575  | 623.06209     | 640.3772432 |                                                     |             |            |            |               |             |                                                                                                    |   |   |   |               |  |
| 2011/12                                                 | 632.9207162 | 687.628616 | 633.499326 | 659.270846    | 642.0853058 |                                                     |             |            |            |               |             |                                                                                                    |   |   |   |               |  |
| 2012/13                                                 | 618.0320999 | 696.93001  | 652.055689 | 668.82826     | 665.2384159 |                                                     |             |            |            |               |             |                                                                                                    |   |   |   |               |  |
| 2013/14                                                 | 663.9566771 | 722.933442 | 695.275583 | 692.315339    | 709.9599346 |                                                     |             |            |            |               |             |                                                                                                    |   |   |   |               |  |
| 2014/15                                                 | 711.4948321 | 714.047951 | 707.264341 | 687.984328    | 707.3169953 |                                                     |             |            |            |               |             |                                                                                                    |   |   |   |               |  |
| 2015/16                                                 | EXCLUDE     | EXCLUDE    | EXCLUDE    | EXCLUDE       | EXCLUDE     |                                                     |             |            |            |               |             |                                                                                                    |   |   |   |               |  |
| 2016/17                                                 | 741.48605   | 753.922382 | 735.149153 | 733.71515     | 705.4444327 |                                                     |             |            |            |               |             |                                                                                                    |   |   |   |               |  |
