# Supplementary material for: Social and ethnic group differences in healthcare use by children aged 0–14 years: a population-based cohort study in England from 2007 to 2017
Source: PubMed Central journal article supplement — Arch Dis Child. 2021 Jul 9;107(1):32–9. doi: 10.1136/archdischild-2020-321045 (PMC8685637; doi:10.1136/archdischild-2020-321045), 2021-07-09
Supplement: archdischild-2020-321045supp004.pdf [file archdischild-2020-321045supp004.pdf]

## Supplemental Table 2 – Raw data for rates of healthcare utilization by setting and ethnic group

| GP CONSULTATIONS                                        |             |             |             |             |             | ED VISITS           |             |             |             |             |             |
|---------------------------------------------------------|-------------|-------------|-------------|-------------|-------------|---------------------|-------------|-------------|-------------|-------------|-------------|
|                                                         | White       | Black       | Asian       | Mixed       | Other       |                     | White       | Black       | Asian       | Mixed       | Other       |
| 2007                                                    | 2112.777    | 2403.5848   | 2988.87272  | 2342.8824   | 1752.5243   | 2007                | 0.806345895 | 0           | 0.127555219 | 0           | 0.242401059 |
| 2008                                                    | 2185.584    | 2369.2728   | 2997.52539  | 2345.9378   | 1765.6721   | 2008                | 120.5168541 | 159.3909901 | 135.0353681 | 144.855733  | 73.65174922 |
| 2009                                                    | 2134.975    | 2363.4656   | 2999.05123  | 2316.9108   | 1748.6148   | 2009                | 230.6980849 | 270.307591  | 232.1291481 | 265.0866242 | 128.0882651 |
| 2010                                                    | 2171.743    | 2305.3134   | 2902.75102  | 2339.7897   | 1747.0475   | 2010                | 304.2966959 | 368.955777  | 336.1990139 | 337.9342663 | 168.8161411 |
| 2011                                                    | 2125.773    | 2274.869    | 2836.51199  | 2297.1148   | 1752.4552   | 2011                | 356.9751935 | 405.0900531 | 378.0538135 | 383.0098133 | 191.2189502 |
| 2012                                                    | 2181.272    | 2274.6588   | 2873.01998  | 2322.9731   | 1775.1606   | 2012                | 374.2368317 | 419.9465568 | 392.5400698 | 410.2271599 | 208.7491789 |
| 2013                                                    | 2072.09     | 2168.3908   | 2677.89651  | 2203.4587   | 1733.8731   | 2013                | 377.3016081 | 415.3187669 | 388.8941668 | 394.2770768 | 227.8725085 |
| 2014                                                    | 2035.422    | 2081.6911   | 2649.49643  | 2138.8077   | 1714.888    | 2014                | 398.0063939 | 414.7445132 | 408.3671587 | 420.5112223 | 236.8780304 |
| 2015                                                    | 1876.142    | 1907.1009   | 2436.97024  | 1955.7985   | 1612.5118   | 2015                | 407.8865529 | 383.1361997 | 397.7792121 | 406.1627598 | 255.8533893 |
| 2016                                                    | 1823.542    | 1961.0535   | 2396.89059  | 1951.2099   | 1662.5251   | 2016                | 401.6633606 | 369.9826168 | 390.0688857 | 373.5965599 | 258.4713237 |
| EMERGENCY ADMISSIONS                                    |             |             |             |             |             | ELECTIVE ADMISSIONS |             |             |             |             |             |
|                                                         | White       | Black       | Asian       | Mixed       | Other       |                     | White       | Black       | Asian       | Mixed       | Other       |
| 2007                                                    | 97.12845    | 87.54143    | 105.7539    | 103.9882    | 38.96787    | 2007                | 64.91204866 | 65.27470684 | 89.13355414 | 76.55479026 | 28.55411533 |
| 2008                                                    | 98.76989    | 99.47611    | 106.8349    | 102.8994    | 39.10239    | 2008                | 63.63705892 | 67.52367284 | 77.23284028 | 72.29138665 | 26.24435087 |
| 2009                                                    | 97.40095    | 88.57699    | 116.2626    | 90.4131     | 38.73675    | 2009                | 62.19859407 | 62.89857088 | 80.27749621 | 72.32072476 | 26.01135371 |
| 2010                                                    | 96.72639    | 89.07146    | 114.2125    | 92.78374    | 39.53646    | 2010                | 61.81228846 | 63.39365973 | 72.24664397 | 64.55056106 | 19.80923462 |
| 2011                                                    | 93.99346    | 84.31535    | 112.035     | 95.49133    | 42.54894    | 2011                | 59.60520835 | 66.19732716 | 83.85458064 | 82.47457677 | 27.16454038 |
| 2012                                                    | 97.70335    | 87.31394    | 109.5237    | 97.3928     | 40.43785    | 2012                | 59.43557622 | 68.70679375 | 84.38948642 | 64.47472882 | 23.74952901 |
| 2013                                                    | 93.52571    | 80.88984    | 97.47871    | 93.96954    | 45.73218    | 2013                | 60.03514588 | 71.23687149 | 87.58266331 | 69.15324706 | 25.38167775 |
| 2014                                                    | 95.96572    | 88.77726    | 102.0314    | 98.58739    | 48.96275    | 2014                | 58.46822213 | 79.13229599 | 65.369485   | 76.69325921 | 29.69872106 |
| 2015                                                    | 96.86989    | 97.24228    | 107.371     | 94.42474    | 59.08668    | 2015                | 56.47009474 | 71.18453411 | 60.89189874 | 79.54917228 | 29.07527942 |
| 2016                                                    | 95.10802    | 95.35245    | 106.8393    | 89.32831    | 64.32755    | 2016                | 55.19931497 | 61.70606848 | 59.87266406 | 84.65828946 | 36.22531824 |
| OUTPATIENT ATTENDANCES                                  |             |             |             |             |             |                     |             |             |             |             |             |
| NB 2015 data are of poor quality and therefore excluded |             |             |             |             |             |                     |             |             |             |             |             |
|                                                         | White       | Black       | Asian       | Mixed       | Other       |                     |             |             |             |             |             |
| 2007                                                    | 640.9623981 | 598.4047373 | 720.4504959 | 687.7004581 | 325.9393763 |                     |             |             |             |             |             |
| 2008                                                    | 698.1540687 | 656.3556329 | 756.7130751 | 720.2939441 | 334.8067149 |                     |             |             |             |             |             |
| 2009                                                    | 730.5182252 | 704.6112266 | 839.0859761 | 784.0932423 | 328.0777532 |                     |             |             |             |             |             |
| 2010                                                    | 752.3384818 | 689.3393772 | 844.9169729 | 817.6025037 | 307.6042845 |                     |             |             |             |             |             |
| 2011                                                    | 762.0283982 | 701.9738853 | 905.3473857 | 841.8670558 | 324.0329639 |                     |             |             |             |             |             |
| 2012                                                    | 761.5426007 | 702.9226963 | 910.4005449 | 844.714608  | 301.7793855 |                     |             |             |             |             |             |
| 2013                                                    | 792.911721  | 736.3178362 | 893.7090678 | 834.2172641 | 348.2449438 |                     |             |             |             |             |             |
| 2014                                                    | 797.7563415 | 713.1079669 | 829.1758359 | 770.9924988 | 348.2470573 |                     |             |             |             |             |             |
| 2015                                                    | EXCLUDE     | EXCLUDE     | EXCLUDE     | EXCLUDE     | EXCLUDE     |                     |             |             |             |             |             |
| 2016                                                    | 808.8978508 | 731.5650067 | 800.9896066 | 736.8122338 | 464.6916383 |                     |             |             |             |             |             |
