# Supplementary figures and images for: Social and ethnic group differences in healthcare use by children aged 0–14 years: a population-based cohort study in England from 2007 to 2017
Source: PubMed Central journal article supplement — Arch Dis Child. 2021 Jul 9;107(1):32–9. doi: 10.1136/archdischild-2020-321045 (PMC8685637; doi:10.1136/archdischild-2020-321045), 2021-07-09

**Figure 1 – Structure of NHS services in England for children aged 0-14 years (simplified)**

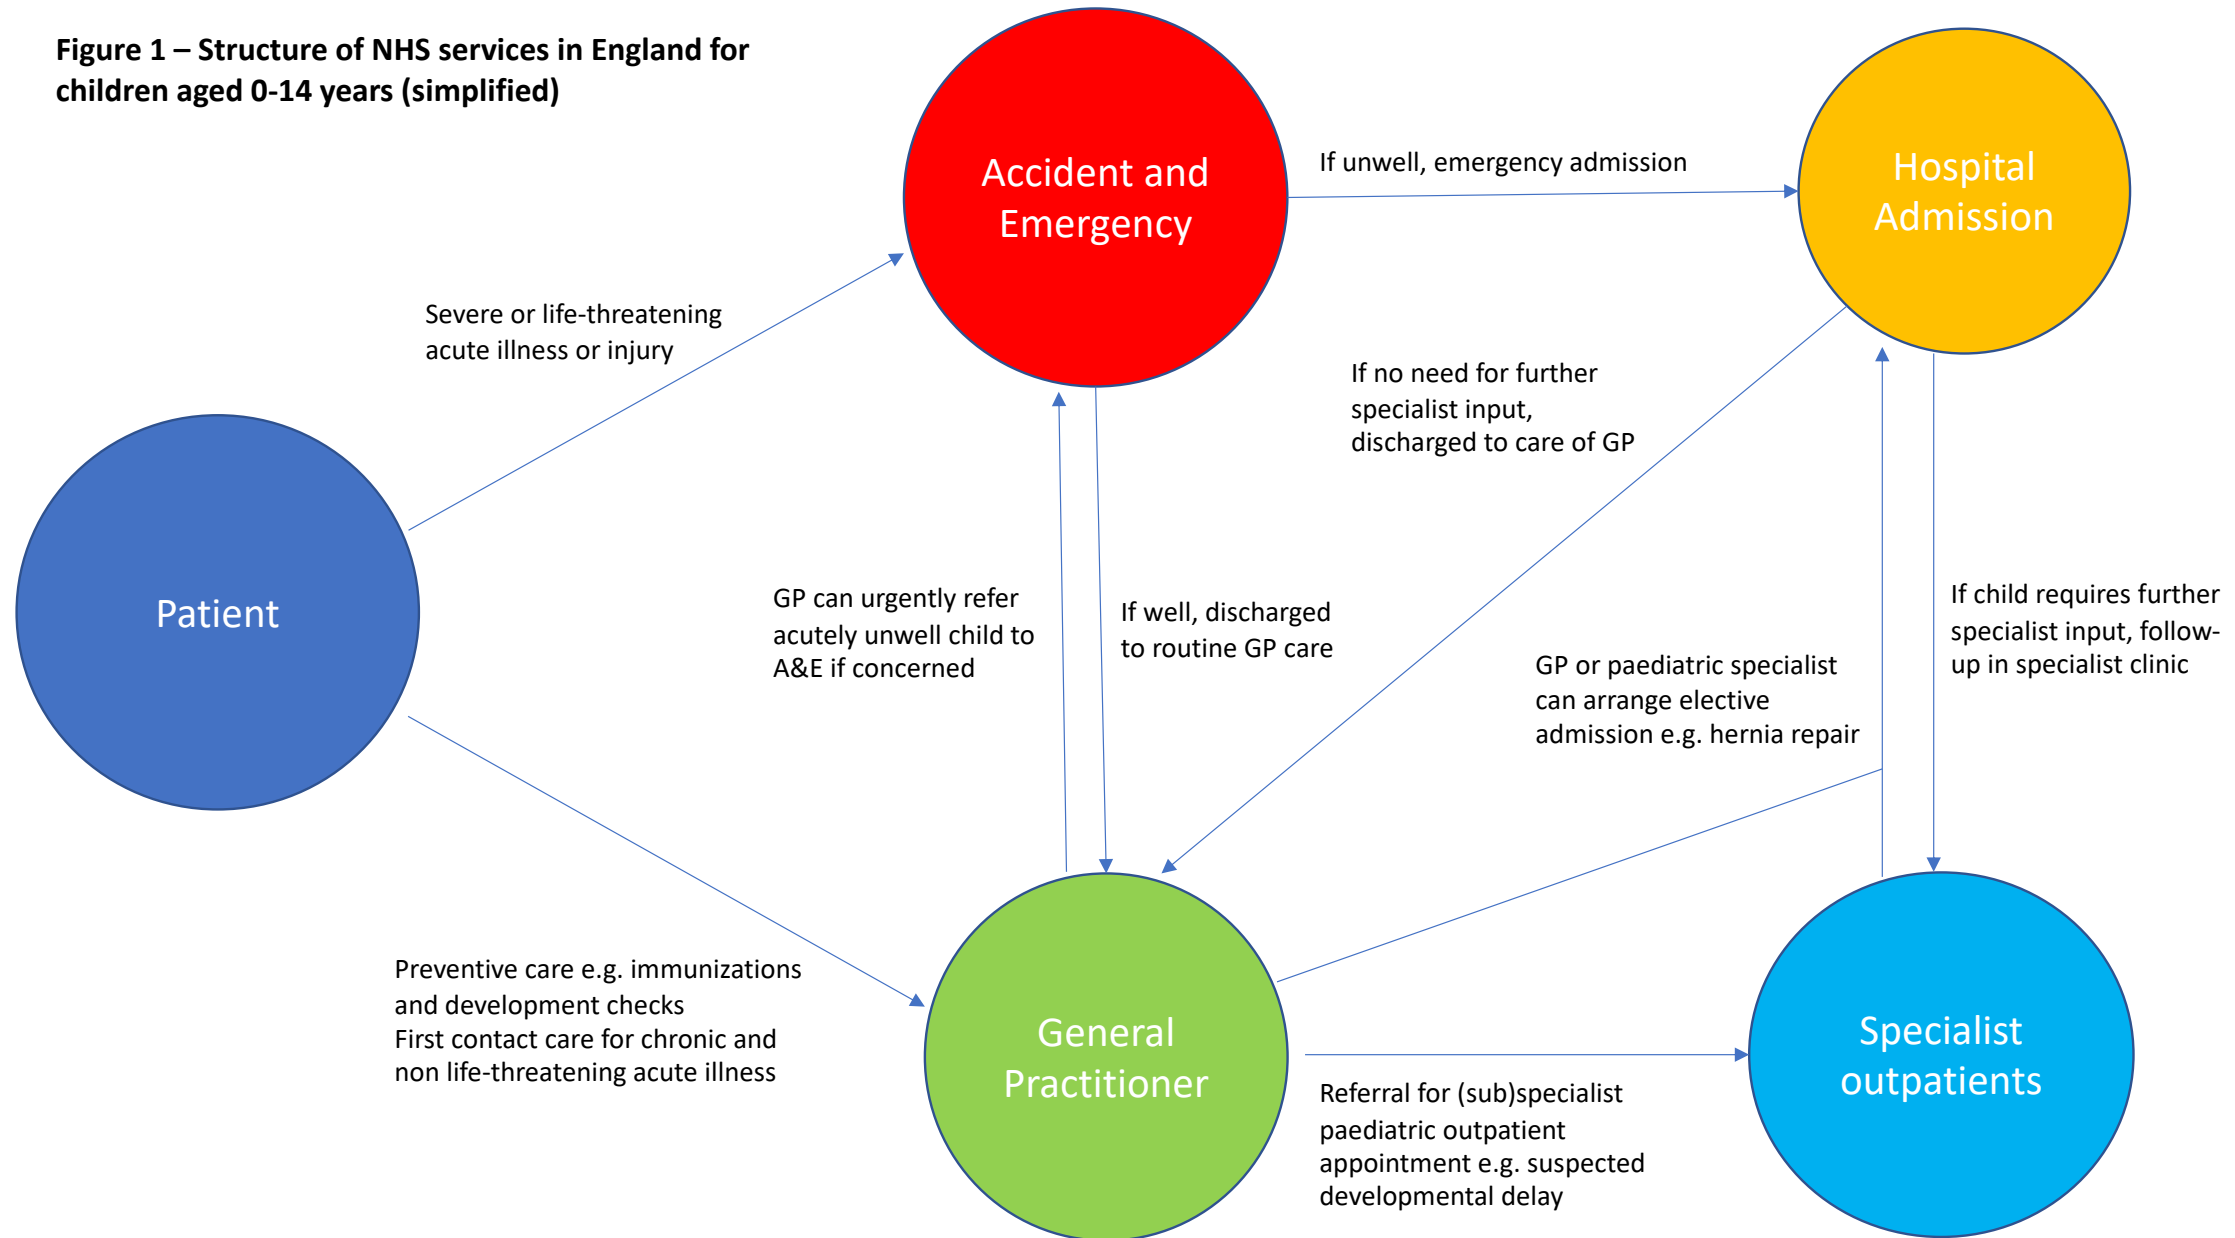

Supplement: archdischild-2020-321045supp001.pdf [file archdischild-2020-321045supp001.pdf]
