# Supplementary figures and images for: Social and ethnic group differences in healthcare use by children aged 0–14 years: a population-based cohort study in England from 2007 to 2017
Source: HighWire-hosted journal article supplement (doi:10.1136/archdischild-2020-321045), 2021-07-09

**Figure 1 – Structure of NHS services in England for children aged 0-14 years (simplified)**

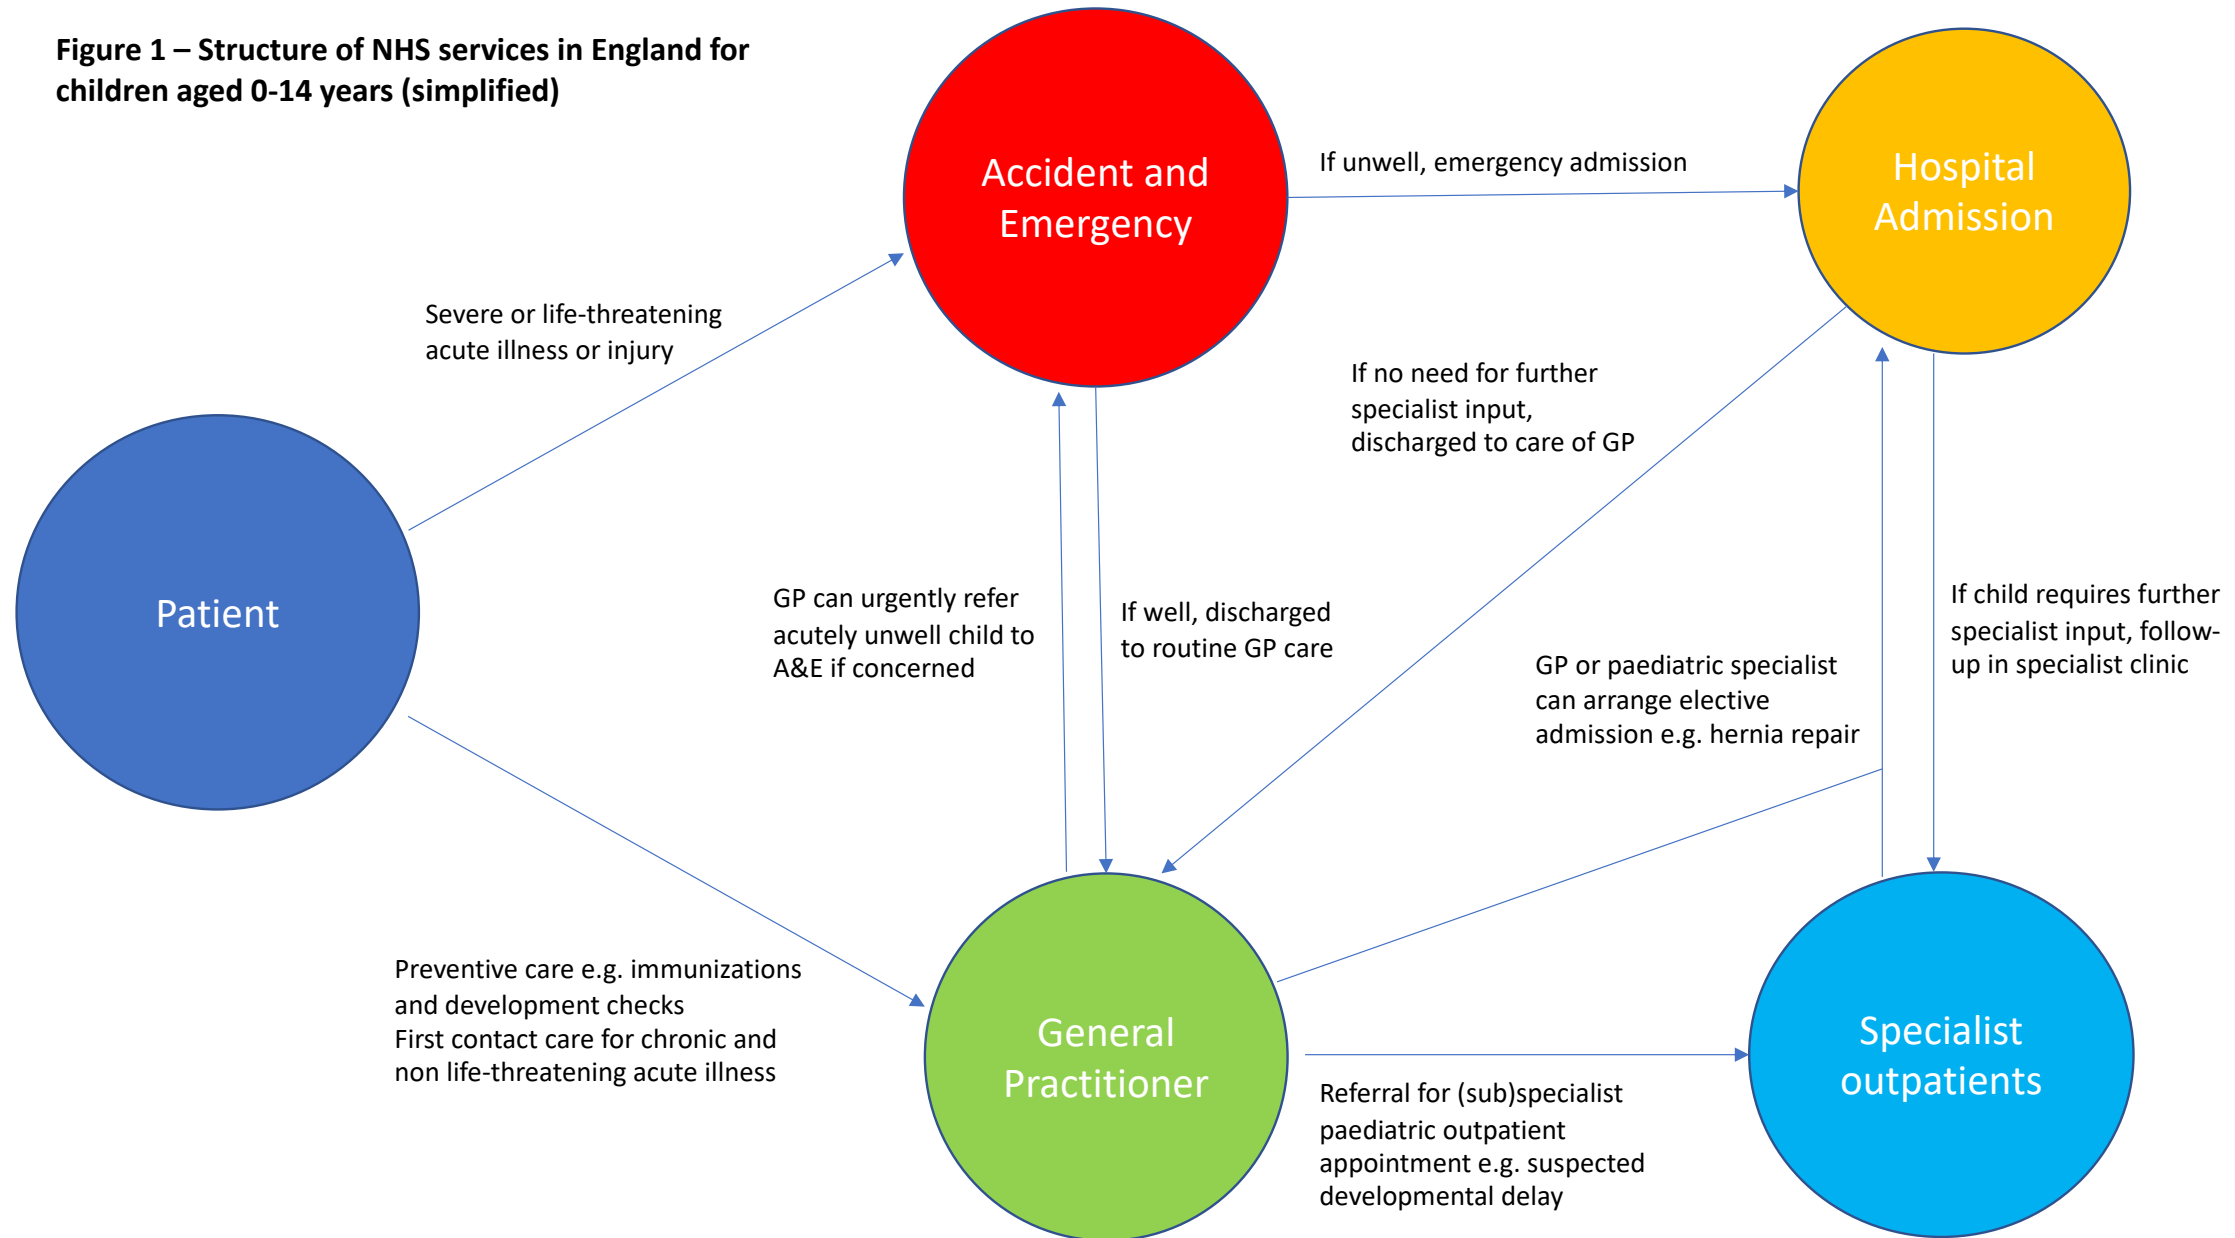

Supplement: archdischild-2020-321045supp001_data_supplement.pdf [file archdischild-2020-321045supp001_data_supplement.pdf]
